# Supplementary material for: An 8 week randomized Dietary Guidelines for Americans -based diet intervention improves the omega-3 index of healthy women
Source: bioRxiv or medRxiv preprint supplement (doi:10.1101/2021.09.22.21263899), 2021-09-23
Supplement: Supplementary file [file media-3.pdf]

Supplemental Table S1: Participant clinical, DEXA and RBC FAME data

| Subject ID                            | Exclusion Comments | Diet Group      | Diet Week       | Baseline and OMS Change Clinics | By Age Range    | Sex | Final BMI  | BMI Category | HOMA-IR | IR Status        | HOMA-IR (%) | Fasting TG (mg/dL) | Fasting Triglyceridemia | Diastolic Pressure | Systolic Pressure | Systolic/Diastolic | Weight (kg) | Total Mass (g) |                    | Total Fat Mass (g)  |                      | Total Lean Mass (g) |                  | Total Lean - BMC (g) |                       | Trunk % Fat |      | Total % Body Fat |  | Android Fat Mass (g) |  | Visceral Fat Mass (g) |  |
|---------------------------------------|--------------------|-----------------|-----------------|---------------------------------|-----------------|-----|------------|--------------|---------|------------------|-------------|--------------------|-------------------------|--------------------|-------------------|--------------------|-------------|----------------|--------------------|---------------------|----------------------|---------------------|------------------|----------------------|-----------------------|-------------|------|------------------|--|----------------------|--|-----------------------|--|
|                                       |                    |                 |                 |                                 |                 |     |            |              |         |                  |             |                    |                         |                    |                   |                    |             | Total Mass (g) | Total Fat Mass (g) | Total Lean Mass (g) | Total Lean - BMC (g) | Trunk % Fat         | Total % Body Fat | Android Fat Mass (g) | Visceral Fat Mass (g) |             |      |                  |  |                      |  |                       |  |
| 3                                     | TAD                | 0 TAD           | 0 TAD           | 6:10 Female                     | 33.9 Obese      |     | 13.17 IR   |              |         |                  |             | 55 Normal          |                         | 73.5               | 126               | 1.71               | 109.4       | 107138.4       | 47095.5            | 57437.7             | 60042.9              | 47.7                | 44               | 4612                 | 8602                  | 53          | 48.7 |                  |  |                      |  |                       |  |
| 9                                     | GDAD               | 0 GDAD Low Resp | 0 GDAD Low Resp | 21:25 Female                    | 28.5 Overweight |     | 2.05 IR    |              | 5.12    | 74 Normal        |             | 63.5               | 119                     | 1.87               | 77.85             |                    |             | 76351.2        | 35374.3            | 39148.3             | 40796.9              | 43.9                | 46.3             | 2601                 | 6867                  | 46          | 50.2 |                  |  |                      |  |                       |  |
| 79                                    | TAD                | 0 TAD           | 0 TAD           | 33:45 Female                    | 33.3 Obese      |     | 1.33 no-IR |              | 71.5    | 110.5            | 5.54        | 71.5               | 110.5                   | 5.54               | 81.3              |                    |             | 80284.2        | 43000.7            | 46218               | 49281.4              | 47.8                | 46.6             | 3669                 | 7463                  | 51.6        | 47.8 |                  |  |                      |  |                       |  |
| 32                                    | GDAD               | 0 GDAD Low Resp | 0 GDAD Low Resp | 36:40 Female                    | 37.7 Obese      |     | 3.15 IR    |              | 5.02    | 348 Mid-Moderate |             | 78                 | 122                     | 1.56               | 114.4             |                    |             | 112297.8       | 51066.3            | 58502.7             | 61231.2              | 48.8                | 45.5             | 2525                 | 9403                  | 52          | 47.9 |                  |  |                      |  |                       |  |
| 51 Missing terminal blood draw        | TAD                | 0 TAD           | 0 TAD           | 46:50 Female                    | 37.7 Obese      |     | 3.24 IR    |              | 5.56    | 260 Mid-Moderate |             | 73.5               | 110.5                   | 1.50               | 95.8              |                    |             | 94509.5        | 44474.3            | 47466.1             | 50035.2              | 46                  | 47.1             | 3468                 | 8457                  | 46.9        | 52.8 |                  |  |                      |  |                       |  |
| 52                                    | TAD                | 0 TAD           | 0 TAD           | 36:40 Female                    | 32.1 Obese      |     | 5.14 IR    |              | 4.9     | 165 Mid-Moderate |             | 80                 | 117                     | 1.46               | 82.9              |                    |             | 81453.1        | 33786.5            | 45874.8             | 47666.5              | 46.3                | 41.5             | 2890                 | 4633                  | 47.1        | 42.2 |                  |  |                      |  |                       |  |
| 53                                    | TAD                | 0 TAD           | 0 TAD           | 41:45 Female                    | 35.6 Obese      |     | 2.55 IR    |              | 5.53    | 84 Normal        |             | 71.5               | 127                     | 1.78               | 88.15             |                    |             | 87156          | 44668.1            | 40607.4             | 42487.9              | 53.8                | 51.3             | 3948                 | 7842                  | 54.2        | 53   |                  |  |                      |  |                       |  |
| 69                                    | TAD                | 0 TAD           | 0 TAD           | 46:50 Female                    | 31.1 Obese      |     | 3.69 IR    |              | 5.21    | 121 Normal       |             | 74                 | 121                     | 1.64               | 77.3              |                    |             | 76169          | 34235.3            | 40049.6             | 41933.7              | 47.3                | 44.9             | 3792                 | 5863                  | 51.9        | 46.8 |                  |  |                      |  |                       |  |
| 72                                    | GDAD               | 0 GDAD Hi Resp  | 0 GDAD Hi Resp  | 41:45 Female                    | 29.9 Overweight |     | 1.44 no-IR |              | 4.88    | 202 Mid-Moderate |             | 74.5               | 127                     | 1.70               | 84.75             |                    |             | 83167.1        | 35456              | 45349.5             | 47711.1              | 45.6                | 42.6             | 3232                 | 6833                  | 47.5        | 47.7 |                  |  |                      |  |                       |  |
| 79                                    | GDAD               | 0 GDAD Hi Resp  | 0 GDAD Hi Resp  | 26:30 Female                    | 33.5 Obese      |     | 1.64 no-IR |              | 5.23    | 36 Normal        |             | 57                 | 112.3                   | 1.94               | 94.5              |                    |             | 92282.1        | 43000.7            | 46218               | 49281.4              | 47.8                | 46.6             | 3669                 | 7463                  | 51.6        | 47.8 |                  |  |                      |  |                       |  |
| 84                                    | GDAD               | 0 GDAD Hi Resp  | 0 GDAD Hi Resp  | 46:50 Female                    | 33.9 Obese      |     | 1.39 no-IR |              | 5.11    | 200 Mid-Moderate |             | 72                 | 125.5                   | 1.74               | 98.8              |                    |             | 95819.2        | 41078.4            | 52393.9             | 54740.8              | 45.8                | 42.9             | 4096                 | 7088                  | 48          | 44.9 |                  |  |                      |  |                       |  |
| 85                                    | TAD                | 0 TAD           | 0 TAD           | 46:50 Female                    | 34.8 Obese      |     | 0.62 no-IR |              | 5.27    | 76 Normal        |             | 72.5               | 119.5                   | 1.65               | 83.15             |                    |             | 81897.2        | 35830.8            | 43672.2             | 46156.5              | 44.3                | 43.7             | 3322                 | 7181                  | 46.6        | 48.1 |                  |  |                      |  |                       |  |
| 87                                    | TAD                | 0 TAD           | 0 TAD           | 51:55 Female                    | 31 Obese        |     | 1.92 no-IR |              | 5.23    | 127 Normal       |             | 63.5               | 107.5                   | 1.69               | 82.55             |                    |             | 81106.1        | 28411.5            | 35149.9             | 35694.7              | 37.6                | 35               | 2606                 | 4517                  | 40.9        | 34.9 |                  |  |                      |  |                       |  |
| 96                                    | GDAD               | 0 GDAD Hi Resp  | 0 GDAD Hi Resp  | 61:65 Female                    | 28 Overweight   |     | 3.43 IR    |              | 5.66    | 126 Normal       |             | 68.5               | 127                     | 1.85               | 70.2              |                    |             | 68910          | 28414.9            | 38763               | 40495.1              | 43.6                | 41.2             | 2463                 | 4824                  | 44.5        | 42.8 |                  |  |                      |  |                       |  |
| 97                                    | GDAD               | 0 GDAD Hi Resp  | 0 GDAD Hi Resp  | 56:60 Female                    | 27.5 Overweight |     | 0.45 no-IR |              | 5.69    | 151 Mid-Moderate |             | 74                 | 123                     | 1.66               | 59.65             |                    |             | 58717.7        | 29948.8            | 34439.2             | 35771.9              | 42.8                | 39.1             | 1949                 | 3177                  | 42.8        | 36.7 |                  |  |                      |  |                       |  |
| 102                                   | GDAD               | 0 GDAD Hi Resp  | 0 GDAD Hi Resp  | 61:65 Female                    | 25.3 Overweight |     | 2.18 IR    |              | 5.16    | 121 Normal       |             | 65.5               | 128.5                   | 1.96               | 69.95             |                    |             | 68450          | 26600.1            | 39799.1             | 41850                | 43.2                | 38.9             | 2725                 | 4252                  | 46.3        | 40.3 |                  |  |                      |  |                       |  |
| 107                                   | GDAD               | 0 GDAD Hi Resp  | 0 GDAD Hi Resp  | 56:60 Female                    | 32 Obese        |     | 1.76 no-IR |              | 5.5     | 59 Normal        |             | 72                 | 126                     | 1.75               | 92.3              |                    |             | 90823          | 36850.6            | 51568               | 53972.4              | 42.3                | 40.6             | 2941                 | 6208                  | 42.3        | 42.9 |                  |  |                      |  |                       |  |
| 109                                   | TAD                | 0 TAD           | 0 TAD           | 61:65 Female                    | 27.7 Overweight |     | 4.11 IR    |              | 5.36    | 59 Normal        |             | 60                 | 119                     | 1.50               | 64.15             |                    |             | 63735.4        | 29835.7            | 31826.5             | 33539.7              | 48.3                | 47.1             | 2091                 | 5675                  | 44.9        | 45   |                  |  |                      |  |                       |  |
| 112                                   | TAD                | 0 TAD           | 0 TAD           | 26:30 Female                    | 33.7 Obese      |     | 2.54 IR    |              | 5.19    | 143 Normal       |             | 68                 | 111.5                   | 1.64               | 84.75             |                    |             | 82637          | 34873.1            | 45674.4             | 47763.9              | 43.3                | 42.2             | 3275                 | 6362                  | 46.4        | 44.7 |                  |  |                      |  |                       |  |
| 113                                   | GDAD               | 0 GDAD Hi Resp  | 0 GDAD Hi Resp  | 51:55 Female                    | 34.2 Obese      |     | 3.08 IR    |              | 5.38    | 29 Normal        |             | 72.5               | 139                     | 1.92               | 105.7             |                    |             | 104060.3       | 41413.1            | 59996.2             | 62647.2              | 39                  | 39.8             | 3125                 | 6607                  | 40.3        | 40.9 |                  |  |                      |  |                       |  |
| 135                                   | TAD                | 0 TAD           | 0 TAD           | 36:40 Female                    | 31.8 Obese      |     | 2.56 IR    |              | 4.96    | 121 Normal       |             | 72                 | 120                     | 1.67               | 97.55             |                    |             | 96637.2        | 40317.1            | 52111.9             | 56320.1              | 44.1                | 41.7             | 4134                 | 5703                  | 46          | 38.8 |                  |  |                      |  |                       |  |
| 137                                   | TAD                | 0 TAD           | 0 TAD           | 56:60 Female                    | 31.9 Obese      |     | 4.81 IR    |              | 5.48    | 116 Normal       |             | 88                 | 135                     | 1.53               | 100.2             |                    |             | 97242.6        | 42203.7            | 52599.4             | 55038.9              | 45.5                | 43.4             | 3841                 | 5637                  | 45.7        | 40.7 |                  |  |                      |  |                       |  |
| 139                                   | GDAD               | 0 GDAD Hi Resp  | 0 GDAD Hi Resp  | 56:60 Female                    | 29.5 Overweight |     | 3.07 IR    |              | 5.27    | 93 Normal        |             | 82                 | 148                     | 1.80               | 72.55             |                    |             | 71338.3        | 28772              | 40867               | 42566.3              | 41.8                | 40.3             | 2935                 | 4337                  | 45.7        | 39.6 |                  |  |                      |  |                       |  |
| 140                                   | TAD                | 0 TAD           | 0 TAD           | 46:50 Female                    | 37 Obese        |     | 3.07 IR    |              | 5.58    | 148 Normal       |             | 56.5               | 109                     | 1.93               | 115.2             |                    |             | 113580.7       | 50325.5            | 60037.4             | 63255.2              | 44.2                | 44.3             | 4063                 | 8663                  | 45.1        | 47.5 |                  |  |                      |  |                       |  |
| 151 Missing baseline RBC data         | TAD                | 0 TAD           | 0 TAD           | 46:50 Female                    | 29.9 Overweight |     | 5.75 IR    |              | 5.75    | 60 Normal        |             | 69                 | 111.5                   | 1.50               | 86.15             |                    |             | 85678.8        | 35928.2            | 47368.1             | 49759.6              | 43.7                | 41.9             | 2891                 | 5675                  | 44.9        | 45   |                  |  |                      |  |                       |  |
| 154                                   | GDAD               | 0 GDAD Low Resp | 0 GDAD Low Resp | 61:65 Female                    | 35.5 Obese      |     | 3.78 IR    |              | 5.49    | 130 Normal       |             | 82.5               | 141                     | 1.71               | 93.8              |                    |             | 92081.4        | 44533.1            | 45447.8             | 47528.3              | 46.9                | 48.4             | 3010                 | 7542                  | 44.7        | 48.4 |                  |  |                      |  |                       |  |
| 168                                   | TAD                | 0 TAD           | 0 TAD           | 46:50 Female                    | 26.8 Overweight |     | 0.78 no-IR |              | 5.25    | 75 Normal        |             | 79.5               | 132.5                   | 1.67               | 72.25             |                    |             | 70099.3        | 24673.7            | 34270.7             | 35425.6              | 28.4                | 35.2             | 1209                 | 4388                  | 28.6        | 39.2 |                  |  |                      |  |                       |  |
| 170                                   | TAD                | 0 TAD           | 0 TAD           | 51:55 Female                    | 37 Obese        |     | 3.96 IR    |              | 5.64    | 67 Normal        |             | 72                 | 120                     | 1.67               | 98.6              |                    |             | 96801.5        | 48335              | 46244.1             | 48466.4              | 51.4                | 49.9             | 4237                 | 5523                  | 52.3        | 50.9 |                  |  |                      |  |                       |  |
| 172                                   | GDAD               | 0 GDAD Hi Resp  | 0 GDAD Hi Resp  | 46:50 Female                    | 32.2 Obese      |     | 1.15 no-IR |              | 4.93    | 52 Normal        |             | 53                 | 107                     | 2.02               | 92.65             |                    |             | 91296.6        | 40424.3            | 48551.1             | 50872.3              | 41.4                | 44.3             | 2992                 | 8092                  | 45.1        | 51   |                  |  |                      |  |                       |  |
| 175                                   | TAD                | 0 TAD           | 0 TAD           | 51:55 Female                    | 27.9 Overweight |     | 3.67 IR    |              | 6.1     | 33 Normal        |             | 75                 | 131                     | 1.75               | 81.55             |                    |             | 80299.6        | 31304.3            | 46825.8             | 48995.3              | 42.1                | 39               | 2649                 | 5479                  | 42.8        | 41.9 |                  |  |                      |  |                       |  |
| 180                                   | TAD                | 0 TAD           | 0 TAD           | 61:65 Female                    | 30.6 Obese      |     | 1.05 no-IR |              | 5.44    | 145 Normal       |             | 68                 | 115.5                   | 1.68               | 81.6              |                    |             | 80201.3        | 33562.8            | 43733.4             | 46358.5              | 39.1                | 41.8             | 2483                 | 5980                  | 40.8        | 43.4 |                  |  |                      |  |                       |  |
| 182                                   | GDAD               | 0 GDAD Low Resp | 0 GDAD Low Resp | 46:50 Female                    | 33.9 Obese      |     | 3.89 IR    |              | 5.39    | 60 Normal        |             | 74                 | 111.5                   | 1.50               | 83.3              |                    |             | 106283.8       | 45355.1            | 58033               | 60648.7              | 46.7                | 42.9             | 4297                 | 8371                  | 49.8        | 48.5 |                  |  |                      |  |                       |  |
| 183                                   | TAD                | 0 TAD           | 0 TAD           | 56:60 Female                    | 40.2 Obese      |     | 4.00 IR    |              | 5.39    | 157 Mid-Moderate |             | 70                 | 99.5                    | 1.42               | 108.45            |                    |             | 107520.4       | 48611.6            | 56788.4             | 58908.8              | 45.1                | 45.2             | 5174                 | 8105                  | 50          | 47.3 |                  |  |                      |  |                       |  |
| 186                                   | TAD                | 0 TAD           | 0 TAD           | 51:55 Female                    | 39.1 Obese      |     | 4.02 IR    |              | 5.72    | 83 Normal        |             | 85                 | 142.5                   | 1.68               | 104.55            |                    |             | 102843.7       | 46633.4            | 53986.8             | 56210.3              | 47.1                | 45.3             | 4470                 | 8081                  | 49.9        | 47.4 |                  |  |                      |  |                       |  |
| 189                                   | GDAD               | 0 GDAD Low Resp | 0 GDAD Low Resp | 61:65 Female                    | 30.7 Obese      |     | 3.49 IR    |              | 5.62    | 142 Normal       |             | 67.5               | 129                     | 1.99               | 77.45             |                    |             | 75180          | 33188.2            | 40220.4             | 41991.8              | 47.3                | 44.1             | 3057                 | 5829                  | 51          | 45   |                  |  |                      |  |                       |  |
| 194                                   | GDAD               | 0 GDAD Low Resp | 0 GDAD Low Resp | 61:65 Female                    | 27.2 Overweight |     | 0.88 no-IR |              | 5.34    | 156 Mid-Moderate |             | 77.5               | 129                     | 1.66               | 79.73             |                    |             | 68912.5        | 32188.7            | 35257.7             | 36723.7              | 52.6                | 46.7             | 3565                 | 5232                  | 52.7        | 46.4 |                  |  |                      |  |                       |  |
| 198 screening and Visit 1 TG mismatch | GDAD               | 0 GDAD Hi Resp  | 0 GDAD Hi Resp  | 51:55 Female                    | 38.7 Obese      |     | 5.41 IR    |              | 5.48    | 426 Mid-Moderate |             | 68                 | 125                     | 1.84               | 104.1             |                    |             | 101912         | 48033.1            | 51561.6             | 53878.9              | 49.5                | 47.1             | 5184                 | 9016                  | 54.5        | 50.6 |                  |  |                      |  |                       |  |
| 232                                   | TAD                | 0 TAD           | 0 TAD           | 61:65 Female                    | 29.5 Overweight |     | 6.05 IR    |              | 5.27    | 193 Mid-Moderate |             | 66                 | 116                     | 1.76               | 73.6              |                    |             | 71933.6        | 30681.7            | 39618.9             | 41251.9              | 44.6                | 42.7             | 2465                 | 4934                  | 45.5        | 42.9 |                  |  |                      |  |                       |  |
| 233                                   | GDAD               | 0 GDAD Low Resp | 0 GDAD Low Resp | 61:65 Female                    | 35.9 Overweight |     | 3.82 IR    |              | 5.82    | 29 Normal        |             | 69                 | 113                     | 1.67               | 81.7              |                    |             | 96795.5        | 43663.6            | 51568               | 53311.9              | 51.2                | 45.1             | 6047                 | 5507                  | 54.3        | 38.3 |                  |  |                      |  |                       |  |
| 239                                   | GDAD               | 0 GDAD Low Resp | 0 GDAD Low Resp | 51:55 Female                    | 30 Obese        |     | 6.24 IR    |              | 5.84    | 52 Normal        |             | 78.5               | 128.5                   | 1.64               | 82.7              |                    |             | 81006.8        | 34530.6            | 43842.1             | 46476.2              | 43.9                | 42.6             | 2525                 | 5576                  | 43.1        | 43.2 |                  |  |                      |  |                       |  |
| 243                                   | GDAD               | 0 GDAD Low Resp | 0 GDAD Low Resp | 56:60 Female                    | 26.3 Overweight |     | 9.49 IR    |              | 5.47    | 201 Mid-Moder    |             |                    |                         |                    |                   |                    |             |                |                    |                     |                      |                     |                  |                      |                       |             |      |                  |  |                      |  |                       |  |

| Analytical Method | Total (mg/g) | Total (mg/cm <sup>2</sup> ) | RRC FAME Sample ID | RRC FAME Aq. Date-Time | RRC FAME Analysis Batch | TG-06-01% Rec. | Wk | RRC FAME Analysis Batch |       |       |        |       |         |         |         |        |       |         |         |         |         |       |         |        | Total Fatty Acids |        |              |              |              |              |         |         |         |
|-------------------|--------------|-----------------------------|--------------------|------------------------|-------------------------|----------------|----|-------------------------|-------|-------|--------|-------|---------|---------|---------|--------|-------|---------|---------|---------|---------|-------|---------|--------|-------------------|--------|--------------|--------------|--------------|--------------|---------|---------|---------|
|                   |              |                             |                    |                        |                         |                |    | D0B-1                   | C14:0 | C15:0 | C16:0  | C17:0 | C18:0   | C18:1n9 | C18:1n7 | C22:6  | C23:6 | C20:3n6 | C20:4n6 | C22:4n6 | C22:5n6 | C20:5 | C22:6n3 | EAFA   |                   | EUFA   | (E+n-6)/PUFA | (E+n-3)/PUFA | (E+n-6)/PUFA | (E+n-3)/PUFA | % C14:0 | % C15:0 | % C16:0 |
| 0.536154383       | 2605.22      | 1.229                       | F195-003 WK181     | 7/25/2018 11:32        | Batch 2                 | 37.2           | 1  | 4.95                    | 9.15  | 3.54  | 302.21 | 5.63  | 323.77  | 115.62  | 23.66   | 78.26  | 18.38 | 102.86  | 45.85   | 7.9     | 5.37    | 36.52 | 50.5    | 644.3  | 139.28            | 253.25 | 92.39        | 1129.22      | 0.81         | 0.31         | 26.76   | 0.50    |         |
| 0.473768021       | 1828.6       | 0.989                       | F195-009 WK181     | 7/26/2018 15:40        | Batch 3                 | 46.7           | 1  | 5.23                    | 33.9  | 5.32  | 485.65 | 5.46  | 336.47  | 164.88  | 32.89   | 109.1  | 23.75 | 152.01  | 70.61   | 13.97   | 4.36    | 37.14 | 76.74   | 865    | 197.7             | 369.44 | 118.24       | 1550.45      | 2.19         | 0.34         | 31.32   | 0.35    |         |
| 0.530926246       | 2721.35      | 1.441                       | F195-009 WK181     | 7/25/2018 22:30        | Batch 3                 | 39.2           | 1  | 4.07                    | 14.25 | 3.04  | 205.07 | 4.57  | 295.35  | 73.97   | 22.1    | 62.48  | 9.41  | 75.18   | 28.39   | 5.87    | 2.67    | 25.56 | 49.3    | 112.8  | 175.33            | 58.11  | 799.32       | 1.78         | 0.32         | 35.66        | 0.18    |         |         |
| 0.558545145       | 2728.41      | 1.231                       | F195-208 WK181     | 7/25/2018 20:07        | Batch 2                 | 48.4           | 1  | 5.70                    | 11.48 | 3.23  | 312.17 | 3.61  | 260.117 | 117.19  | 20.19   | 52.51  | 16.61 | 86.12   | 43.33   | 7.88    | 3.31    | 38.15 | 54.87   | 590.67 | 137.31            | 206.45 | 86.33        | 1026.76      | 1.12         | 0.32         | 30.58   | 0.35    |         |
| 0.410074495       | 2569.12      | 1.319                       | F195-051 WK181     | 7/25/2018 19:30        | Batch 2                 | 45.1           | 1  | 4.41                    | 9.27  | 2.97  | 264.58 | 4.45  | 270.182 | 146.19  | 12.84   | 42.25  | 10.79 | 62.36   | 36.37   | 7.35    | 2.24    | 20.19 | 36.02   | 551.59 | 90.03             | 159.12 | 58.45        | 868.19       | 1.07         | 0.34         | 30.48   | 0.51    |         |
| 0.623785884       | 1791.23      | 1.023                       | F195-052 WK181     | 7/27/2018 5:45         | Batch 3                 | 57.2           | 1  | 6.25                    | 20.24 | 3.32  | 324.54 | 5.05  | 183.14  | 116.28  | 24.36   | 72.17  | 14.66 | 92.42   | 31.02   | 6.29    | 4.26    | 26.73 | 57.29   | 140.64 | 156.76            | 88.15  | 982.64       | 2.06         | 0.34         | 32.82        | 0.31    |         |         |
| 0.503442999       | 1880.49      | 1.088                       | F195-053 WK181     | 7/25/2018 4:30         | Batch 3                 | 39.9           | 1  | 4.54                    | 25.27 | 5.47  | 270.07 | 6.98  | 294.72  | 213.05  | 29.83   | 132.03 | 16.76 | 20.75   | 63.51   | 16.03   | 9.22    | 36.62 | 67.59   | 879.48 | 242.88            | 334.63 | 1690.07      | 1.50         | 0.32         | 32.37        | 0.41    |         |         |
| 0.646767866       | 1880.49      | 1.112                       | F195-069 WK181     | 7/25/2018 7:10         | Batch 3                 | 30.9           | 1  | 4.82                    | 3.71  | 1.31  | 268.84 | 2.34  | 261.68  | 80.78   | 16.81   | 42.33  | 6.65  | 87.7    | 6.55    | 10.57   | 12.65   | 2.7   | 25.96   | 40.74  | 537.88            | 97.59  | 191.79       | 6.94         | 90.02        | 0.41         | 0.15    | 29.80   | 0.26    |
| 0.472996863       | 2361.57      | 1.193                       | F195-072 WK181     | 7/26/2018 19:45        | Batch 3                 | 54.2           | 1  | 6.43                    | 23.89 | 3.64  | 376.86 | 7.37  | 207.04  | 147.68  | 31.06   | 58.58  | 12.37 | 76.88   | 38.92   | 11.34   | 2.67    | 20.72 | 67.18   | 618.67 | 178.74            | 198.09 | 90.05        | 1085.5       | 2.20         | 0.32         | 34.72   | 0.68    |         |
| 0.491625352       | 3053.34      | 1.441                       | F195-079 WK181     | 7/25/2018 22:30        | Batch 3                 | 79.2           | 1  | 7.53                    | 15.49 | 3.04  | 205.07 | 4.57  | 295.35  | 73.97   | 22.1    | 62.48  | 9.41  | 75.18   | 28.39   | 5.87    | 2.67    | 25.56 | 49.3    | 112.8  | 175.33            | 58.11  | 799.32       | 1.78         | 0.32         | 35.66        | 0.18    |         |         |
| 0.577878104       | 2461.92      | 1.193                       | F195-084 WK181     | 7/25/2018 7:33         | Batch 3                 | 57.1           | 1  | 5.63                    | 12.87 | 3.59  | 420.33 | 4.1   | 287.26  | 127.34  | 27.98   | 87.87  | 21.98 | 11.04   | 53.06   | 15.63   | 4.61    | 33.91 | 67.32   | 728.15 | 155.22            | 288.94 | 100.84       | 1278.25      | 1.01         | 0.28         | 32.88   | 0.32    |         |
| 0.462069664       | 2484.3       | 1.319                       | F195-085 WK181     | 7/24/2018 21:53        | Batch 3                 | 60.1           | 1  | 4.95                    | 2.85  | 5.72  | 377.6  | 8.32  | 392.73  | 151.15  | 27.14   | 96.89  | 21.73 | 168.35  | 74.56   | 17.6    | 7.75    | 79.85 | 66.41   | 787.22 | 178.29            | 379.13 | 154.01       | 1498.65      | 1.09         | 0.38         | 25.20   | 0.56    |         |
| 0.576931592       | 2544.75      | 1.282                       | F195-087 rehoth    | 7/30/2018 11:10        | Batch 3                 | 40.2           | 1  | 5.84                    | 7.92  | 1.52  | 277.71 | 1.43  | 127.31  | 90.96   | 19.57   | 51.73  | 8.06  | 88.95   | 29.54   | 4.76    | 3.07    | 17.68 | 42.02   | 415.89 | 103.52            | 183.04 | 62.77        | 772.23       | 1.03         | 0.20         | 35.96   | 0.19    |         |
| 0.510371209       | 1732.09      | 1.001                       | F195-096 WK181     | 7/24/2018 22:32        | Batch 3                 | 46.5           | 1  | 7.97                    | 1.01  | 2.44  | 255.86 | 5.34  | 232.71  | 81.39   | 12.51   | 47.17  | 14.78 | 19.51   | 41.18   | 8.18    | 5.37    | 27.19 | 64.17   | 497.36 | 93.19             | 184.79 | 96.73        | 942.12       | 1.02         | 0.28         | 29.34   | 0.61    |         |
| 0.615471829       | 1332.71      | 0.909                       | F195-097 WK181     | 7/26/2018 15:18        | Batch 3                 | 43.1           | 1  | 5.31                    | 26.84 | 4.98  | 275.69 | 5.15  | 233.74  | 94.34   | 20.31   | 63.28  | 15.79 | 69.38   | 37.01   | 5.02    | 3.25    | 24.26 | 47.01   | 565.96 | 115.25            | 190.48 | 74.52        | 876.21       | 2.84         | 0.53         | 29.14   | 0.54    |         |
| 0.640874882       | 2050.85      | 1.107                       | F195-102 WK181     | 7/25/2018 0:52         | Batch 3                 | 33.1           | 1  | 7.40                    | 2.85  | 2.99  | 395.72 | 5.78  | 404.24  | 168.88  | 24.4    | 99.32  | 18.76 | 145.76  | 61.4    | 15.93   | 9.4     | 68.66 | 104.41  | 821.58 | 192.78            | 341.17 | 182.47       | 1558         | 0.19         | 0.25         | 27.38   | 0.38    |         |
| 0.473743557       | 2404.34      | 1.172                       | F195-107 WK181     | 7/27/2018 2:48         | Batch 3                 | 33.1           | 1  | 6.74                    | 9.63  | 4.47  | 388.42 | 5.08  | 307.66  | 72.81   | 16.61   | 58.99  | 9.91  | 99.15   | 48.24   | 24      | 3.18    | 31.87 | 55.09   | 465.06 | 89.42             | 219.76 | 90.4         | 864.38       | 1.11         | 0.52         | 15.99   | 0.59    |         |
| 0.464571799       | 1713.24      | 1.052                       | F195-109 WK181     | 7/25/2018 0:52         | Batch 3                 | 45.7           | 1  | 6.74                    | 8.57  | 2.99  | 322.26 | 3.81  | 251.09  | 74.13   | 17.55   | 51.15  | 10.21 | 82.45   | 40.49   | 9.69    | 2.58    | 24.52 | 55.85   | 488.68 | 91.68             | 193.99 | 82.95        | 867          | 0.99         | 0.34         | 26.78   | 0.44    |         |
| 0.514775228       | 2089.51      | 1.136                       | F195-112 WK181     | 7/26/2018 7:09         | Batch 2                 | 48.7           | 1  | 5.79                    | 11.06 | 2.47  | 246.27 | 2.76  | 179.72  | 113.12  | 12.12   | 59.91  | 11.25 | 72.95   | 38.83   | 5.59    | 2.45    | 22.69 | 43.41   | 442.28 | 93.25             | 185.53 | 68.55        | 792.14       | 1.40         | 0.31         | 31.07   | 0.35    |         |
| 0.4729832         | 2650.98      | 1.182                       | F195-113 WK181     | 7/25/2018 18:10        | Batch 2                 | 54.7           | 1  | 5.62                    | 6.99  | 2.42  | 241.79 | 3.88  | 266.64  | 88.14   | 14.91   | 71.41  | 40.42 | 89.46   | 45.51   | 10.63   | 3.15    | 21.12 | 48.88   | 521.72 | 103.25            | 227.43 | 73.59        | 925.79       | 1.76         | 0.26         | 26.12   | 0.42    |         |
| 0.724881641       | 2108.26      | 1.054                       | F195-135 WK181     | 7/26/2018 18:15        | Batch 3                 | 26.6           | 1  | 5.49                    | 33.94 | 2.50  | 320.65 | 8.1   | 303.2   | 128.84  | 28.04   | 69.07  | 13.17 | 117.7   | 52.11   | 12.26   | 3.8     | 45.46 | 62.11   | 667.56 | 158.86            | 264.41 | 113.7        | 1200.22      | 2.83         | 0.21         | 27.71   | 0.39    |         |
| 0.681390811       | 2439.52      | 1.126                       | F195-137 WK181     | 7/26/2018 9:22         | Batch 2                 | 47.2           | 1  | 3.92                    | 23.31 | 4.42  | 385.71 | 5.41  | 368.63  | 170.9   | 27.3    | 89.57  | 18.77 | 124.12  | 57.97   | 14.55   | 3.41    | 37.51 | 787.48  | 298.24 | 304.98            | 91.27  | 1381.93      | 1.69         | 0.32         | 29.91        | 0.72    |         |         |
| 0.5673507         | 1699.34      | 1.023                       | F195-139 WK181     | 7/27/2018 3:32         | Batch 3                 | 66.1           | 1  | 3.59                    | 21.51 | 5.52  | 498.22 | 5.16  | 330.08  | 123.68  | 13.07   | 69.21  | 18.06 | 114.97  | 49.9    | 8.81    | 4.76    | 33.74 | 44.59   | 860.49 | 172.03            | 290.95 | 83.09        | 1376.56      | 1.56         | 0.40         | 36.19   | 0.37    |         |
| 0.48039803        | 3217.85      | 1.401                       | F195-144 WK181     | 7/27/2018 10:32        | Batch 3                 | 50.4           | 1  | 7.66                    | 23.97 | 4.85  | 366.55 | 3.9   | 189.45  | 143.08  | 13.02   | 67.58  | 14.47 | 81.26   | 30.35   | 3.35    | 5.37    | 17.39 | 75.72   | 588.72 | 147.51            | 197.01 | 98.49        | 1059.31      | 2.26         | 0.46         | 34.60   | 0.37    |         |
| 0.399098382       | 2080.57      | 1.035                       | F195-154 rehoth    | 7/30/2018 10:48        | Batch 3                 | 70.4           | 1  | 5.27                    | 1.29  | 3.34  | 214.68 | 1.2   | 157.13  | 59.81   | 16.44   | 40.63  | 7.63  | 60.25   | 21.71   | 6.24    | 2.44    | 15.68 | 31.36   | 377.64 | 76.45             | 136.46 | 50.48        | 641.03       | 0.20         | 0.52         | 33.49   | 0.19    |         |
| 0.27699862        | 2154.87      | 1.072                       | F195-168 WK181     | 7/30/2018 11:12        | Batch 3                 | 49.3           | 1  | 9.07                    | 6.88  | 1.01  | 280.52 | 0.92  | 148.27  | 54.44   | 13.88   | 44.39  | 8.08  | 40.07   | 10.18   | 4.04    | 6.15    | 23.33 | 47.3    | 337.6  | 69.32             | 103.76 | 78.78        | 589.45       | 1.17         | 0.17         | 30.63   | 0.16    |         |
| 0.513389701       | 2222.34      | 1.143                       | F195-170 WK181     | 7/26/2018 19:22        | Batch 3                 | 22.7           | 1  | 6.04                    | 21.66 | 4     | 298.67 | 6.2   | 147.57  | 124.63  | 26.21   | 72.17  | 13.7  | 133.15  | 59.84   | 30.31   | 3.51    | 42.29 | 56.87   | 475.23 | 150.84            | 106.77 | 103.67       | 998.91       | 2.17         | 0.40         | 29.66   | 0.67    |         |
| 0.369747899       | 2321.12      | 1.115                       | F195-172 WK181     | 7/26/2018 17:26        | Batch 3                 | 32.8           | 1  | 7.05                    | 1.21  | 1.1   | 164.85 | 2.72  | 206.57  | 61.89   | 8.23    | 38.49  | 7.49  | 63.15   | 31.5    | 5.18    | 2.28    | 22.72 | 49.2    | 440.45 | 70.12             | 145.81 | 74.2         | 730.58       | 1.07         | 0.15         | 22.56   | 0.37    |         |
| 0.483482787       | 1869.56      | 1.112                       | F195-175 WK181     | 7/24/2018 22:15        | Batch 3                 | 44.8           | 1  | 6.65                    | 7.42  | 4.52  | 344.67 | 7.44  | 292.45  | 132.27  | 24.84   | 102.08 | 17.93 | 127.78  | 48.45   | 10.34   | 8.02    | 24.29 | 75.19   | 66.55  | 157.11            | 306.58 | 130.5        | 1250.69      | 0.59         | 0.36         | 27.56   | 0.59    |         |
| 0.473743557       | 2404.34      | 1.172                       | F195-180 WK181     | 7/26/2018 11:34        | Batch 3                 | 48.8           | 1  | 7.18                    | 11.29 | 2.90  | 230.33 | 3.73  | 247.67  | 119.57  | 18.48   | 57.12  | 10.44 | 88.95   | 39.19   | 8.1     | 8.51    | 20.92 | 62.04   | 493.68 | 133.03            | 195.21 | 86.47        | 813.39       | 1.24         | 0.13         | 25.21   | 0.36    |         |
| 0.513319795       | 2615.64      | 1.192                       | F195-181 WK181     | 7/25/2018 18:10        | Batch 3                 | 40.5           | 1  | 6.74                    | 8.57  | 2.99  | 322.26 | 3.81  | 251.09  | 74.13   | 17.55   | 51.15  | 10.21 | 82.45   | 40.49   | 9.69    | 2.58    | 24.52 | 55.85   | 488.68 | 91.68             | 193.99 | 82.95        | 867          | 0.99         | 0.34         | 26.78   | 0.44    |         |
| 0.638371376       | 2120.41      | 1.112                       | F195-1             |                        |                         |                |    |                         |       |       |        |       |         |         |         |        |       |         |         |         |         |       |         |        |                   |        |              |              |              |              |         |         |         |

|       | % C18:0 | % C18:1n7 | % C18:1n7 | % C18:2n6 | % C20:0n6 | % C20:1n7 | % C20:2n6 | % C20:3n6 | % C20:4n6 | % C22:0n6 | % C22:1n7 | % C22:2n6 | % C22:3n6 | % C22:4n6 | % C22:5n6 | % C22:6n3 | % C22:6n3 | % SFA% | % MUFA% | % PUFA% | % PUFA% | % PUFA% |
|-------|---------|-----------|-----------|-----------|-----------|-----------|-----------|-----------|-----------|-----------|-----------|-----------|-----------|-----------|-----------|-----------|-----------|--------|---------|---------|---------|---------|
| 28.67 | 10.24   | 2.10      | 6.93      | 1.63      | 9.11      | 4.06      | 0.70      | 0.48      | 3.23      | 4.47      | 57.06     | 12.33     | 22.43     | 8.18      |           |           |           |        |         |         |         |         |
| 21.59 | 10.63   | 2.12      | 7.04      | 1.53      | 9.80      | 4.55      | 0.90      | 0.28      | 2.40      | 4.95      | 55.79     | 12.76     | 23.83     | 7.63      |           |           |           |        |         |         |         |         |
| 17.49 | 12.75   | 2.62      | 7.07      | 1.18      | 7.03      | 3.20      | 3.74      | 55.43     | 15.36     | 3.36      | 15.93     | 12.27     |           |           |           |           |           |        |         |         |         |         |
| 25.49 | 11.47   | 1.98      | 5.14      | 1.63      | 8.44      | 4.24      | 0.77      | 0.32      | 2.76      | 5.38      | 57.87     | 13.45     | 20.23     | 8.46      |           |           |           |        |         |         |         |         |
| 31.14 | 9.93    | 1.48      | 4.87      | 1.24      | 7.18      | 4.19      | 0.85      | 0.26      | 2.33      | 4.15      | 63.53     | 11.41     | 18.33     | 6.73      |           |           |           |        |         |         |         |         |
| 19.15 | 11.83   | 2.48      | 7.34      | 1.49      | 9.41      | 3.16      | 0.64      | 0.43      | 2.72      | 5.82      | 54.68     | 14.31     | 22.04     | 8.97      |           |           |           |        |         |         |         |         |
| 17.44 | 12.61   | 1.77      | 7.81      | 0.99      | 12.17     | 3.76      | 0.95      | 0.55      | 3.36      | 4.00      | 52.04     | 14.37     | 25.68     | 7.91      |           |           |           |        |         |         |         |         |
| 29.01 | 8.96    | 1.86      | 5.12      | 1.07      | 9.72      | 4.54      | 1.40      | 0.30      | 2.88      | 4.52      | 59.63     | 10.82     | 21.86     | 7.69      |           |           |           |        |         |         |         |         |
| 19.07 | 13.60   | 2.86      | 5.40      | 1.14      | 7.08      | 3.59      | 1.04      | 0.25      | 1.86      | 6.19      | 56.99     | 16.47     | 18.25     | 8.30      |           |           |           |        |         |         |         |         |
| 31.43 | 8.76    | 1.90      | 7.41      | 1.06      | 8.07      | 3.78      | 0.95      | 0.28      | 2.61      | 7.25      | 58.14     | 10.66     | 21.06     | 10.14     |           |           |           |        |         |         |         |         |
| 22.47 | 9.96    | 2.19      | 6.87      | 1.72      | 8.64      | 4.15      | 1.22      | 0.36      | 2.65      | 5.27      | 56.96     | 12.15     | 22.60     | 8.28      |           |           |           |        |         |         |         |         |
| 26.21 | 10.09   | 1.81      | 6.47      | 1.45      | 11.23     | 4.98      | 1.17      | 0.52      | 5.33      | 4.43      | 52.53     | 11.90     | 25.30     | 10.28     |           |           |           |        |         |         |         |         |
| 16.49 | 11.78   | 2.53      | 6.70      | 1.04      | 11.52     | 3.83      | 0.62      | 0.40      | 2.29      | 5.44      | 53.86     | 14.31     | 23.70     | 8.13      |           |           |           |        |         |         |         |         |
| 26.68 | 9.33    | 1.43      | 5.41      | 1.05      | 9.00      | 4.72      | 0.94      | 0.62      | 3.12      | 7.36      | 57.03     | 10.77     | 21.12     | 11.09     |           |           |           |        |         |         |         |         |
| 26.77 | 9.97    | 2.21      | 6.69      | 1.67      | 7.33      | 3.91      | 0.53      | 0.34      | 2.56      | 4.97      | 59.81     | 12.18     | 20.13     | 7.88      |           |           |           |        |         |         |         |         |
| 26.93 | 10.95   | 1.59      | 6.46      | 1.22      | 9.48      | 3.99      | 1.04      | 0.61      | 4.46      | 6.79      | 53.42     | 12.53     | 22.18     | 11.86     |           |           |           |        |         |         |         |         |
| 35.59 | 8.42    | 1.92      | 6.79      | 1.10      | 11.47     | 5.57      | 0.49      | 0.37      | 3.69      | 6.37      | 55.80     | 10.35     | 25.42     | 10.43     |           |           |           |        |         |         |         |         |
| 28.95 | 8.55    | 2.02      | 5.90      | 1.18      | 9.51      | 4.67      | 1.12      | 0.30      | 2.83      | 6.44      | 57.50     | 10.57     | 23.17     | 9.56      |           |           |           |        |         |         |         |         |
| 22.67 | 10.24   | 1.53      | 7.56      | 1.42      | 9.20      | 4.90      | 0.71      | 0.31      | 2.86      | 5.48      | 55.80     | 11.76     | 23.79     | 8.65      |           |           |           |        |         |         |         |         |
| 28.80 | 9.52    | 1.61      | 7.71      | 1.13      | 9.66      | 4.92      | 1.15      | 0.34      | 2.33      | 5.28      | 56.35     | 11.13     | 24.57     | 7.95      |           |           |           |        |         |         |         |         |
| 25.19 | 10.73   | 2.34      | 5.76      | 1.10      | 9.81      | 4.34      | 1.02      | 0.32      | 3.79      | 5.17      | 55.62     | 13.07     | 22.03     | 9.28      |           |           |           |        |         |         |         |         |
| 26.68 | 12.37   | 1.98      | 6.48      | 1.36      | 8.98      | 4.19      | 1.05      | 0.25      | 2.69      | 3.67      | 56.98     | 14.34     | 22.07     | 6.60      |           |           |           |        |         |         |         |         |
| 23.98 | 8.98    | 1.33      | 7.21      | 1.31      | 8.35      | 3.62      | 0.64      | 0.35      | 2.45      | 3.24      | 62.51     | 10.32     | 21.14     | 6.04      |           |           |           |        |         |         |         |         |
| 17.88 | 13.51   | 3.02      | 6.38      | 1.37      | 7.67      | 2.87      | 0.32      | 0.51      | 1.64      | 7.15      | 55.58     | 16.53     | 18.60     | 9.30      |           |           |           |        |         |         |         |         |
| 24.51 | 9.33    | 2.60      | 6.34      | 1.19      | 9.40      | 3.39      | 0.97      | 0.38      | 2.60      | 4.89      | 58.91     | 11.93     | 21.29     | 7.87      |           |           |           |        |         |         |         |         |
| 25.15 | 9.41    | 2.35      | 7.53      | 1.37      | 6.90      | 1.73      | 0.07      | 1.04      | 4.30      | 8.02      | 57.27     | 11.76     | 17.60     | 13.36     |           |           |           |        |         |         |         |         |
| 14.67 | 12.48   | 2.62      | 7.22      | 1.37      | 11.33     | 5.99      | 1.03      | 0.35      | 4.33      | 5.69      | 47.57     | 15.10     | 26.95     | 10.38     |           |           |           |        |         |         |         |         |
| 37.03 | 8.47    | 1.13      | 5.27      | 1.03      | 8.64      | 4.31      | 0.71      | 0.31      | 3.11      | 6.73      | 60.29     | 9.60      | 19.96     | 10.16     |           |           |           |        |         |         |         |         |
| 23.38 | 10.58   | 1.99      | 8.16      | 1.43      | 10.22     | 3.87      | 0.83      | 0.64      | 3.78      | 6.01      | 52.49     | 12.56     | 24.51     | 10.43     |           |           |           |        |         |         |         |         |
| 27.12 | 13.09   | 2.02      | 6.25      | 1.14      | 8.80      | 4.29      | 0.89      | 0.38      | 2.29      | 6.79      | 54.05     | 15.11     | 21.37     | 9.47      |           |           |           |        |         |         |         |         |
| 31.66 | 8.41    | 4.43      | 6.56      | 1.44      | 9.47      | 4.48      | 0.40      | 0.32      | 2.88      | 6.50      | 58.22     | 10.84     | 22.12     | 9.82      |           |           |           |        |         |         |         |         |
| 33.63 | 7.89    | 1.30      | 5.09      | 0.88      | 7.37      | 3.55      | 0.55      | 0.43      | 2.80      | 4.61      | 65.52     | 9.20      | 17.44     | 7.85      |           |           |           |        |         |         |         |         |
| 25.93 | 11.25   | 1.91      | 5.77      | 1.33      | 10.96     | 4.83      | 1.02      | 0.32      | 3.01      | 5.34      | 54.25     | 13.16     | 23.91     | 8.68      |           |           |           |        |         |         |         |         |
| 25.33 | 13.61   | 1.84      | 6.97      | 1.09      | 9.83      | 4.32      | 1.40      | 0.16      | 2.77      | 4.08      | 53.94     | 15.44     | 23.62     | 7.00      |           |           |           |        |         |         |         |         |
| 25.26 | 13.06   | 1.85      | 5.28      | 1.10      | 11.28     | 4.70      | 1.14      | 0.51      | 3.69      | 4.00      | 53.41     | 14.90     | 23.50     | 8.19      |           |           |           |        |         |         |         |         |
| 22.90 | 12.29   | 1.95      | 5.61      | 1.32      | 7.26      | 3.34      | 0.50      | 0.29      | 1.89      | 3.73      | 61.82     | 14.24     | 18.04     | 5.90      |           |           |           |        |         |         |         |         |
| 23.50 | 11.55   | 2.08      | 7.04      | 1.06      | 10.09     | 3.50      | 0.91      | 0.38      | 3.02      | 7.66      | 52.72     | 13.63     | 22.60     | 11.06     |           |           |           |        |         |         |         |         |
| 16.99 | 13.06   | 2.74      | 7.49      | 1.34      | 12.68     | 9.54      | 3.51      | 0.76      | 15.80     | 24.47     | 51.97     |           |           |           |           |           |           |        |         |         |         |         |
| 28.06 | 8.26    | 1.70      | 5.46      | 1.25      | 10.07     | 4.55      | 0.95      | 0.56      | 3.17      | 6.31      | 57.73     | 9.96      | 22.28     | 10.04     |           |           |           |        |         |         |         |         |
| 23.96 | 11.38   | 1.54      | 5.58      | 1.29      | 9.64      | 3.54      | 0.63      | 0.66      | 3.53      | 6.37      | 55.85     | 12.91     | 20.68     | 10.56     |           |           |           |        |         |         |         |         |
| 30.66 | 10.34   | 1.95      | 5.65      | 2.02      | 8.02      | 4.67      | 1.04      | 0.35      | 3.37      | 3.94      | 58.65     | 12.29     | 21.40     | 7.66      |           |           |           |        |         |         |         |         |
| 21.87 | 11.72   | 2.63      | 6.26      | 1.20      | 12.18     | 4.83      | 1.24      | 0.38      | 2.94      | 4.93      | 51.68     | 14.35     | 25.71     | 8.25      |           |           |           |        |         |         |         |         |
| 22.41 | 13.32   | 2.00      | 7.74      | 1.90      | 10.28     | 4.17      | 1.06      | 0.49      | 3.92      | 4.66      | 52.45     | 15.33     | 23.15     | 9.08      |           |           |           |        |         |         |         |         |
| 25.12 | 10.36   | 2.32      | 7.44      | 1.88      | 10.98     | 4.58      | 0.57      | 0.49      | 3.79      | 5.58      | 52.00     | 12.68     | 25.45     | 9.87      |           |           |           |        |         |         |         |         |
| 35.72 | 8.07    | 1.41      | 5.26      | 1.05      | 7.72      | 0.18      | 1.83      | 7.75      | 65.80     | 10.48     | 17.96     | 15.76     |           |           |           |           |           |        |         |         |         |         |
| 21.65 | 10.55   | 1.94      | 6.74      | 1.42      | 11.94     | 5.01      | 1.29      | 0.31      | 4.65      | 5.08      | 51.07     | 12.49     | 26.41     | 10.03     |           |           |           |        |         |         |         |         |
| 23.53 | 12.14   | 1.87      | 5.37      | 1.66      | 9.08      | 4.52      | 0.81      | 0.35      | 2.27      | 5.46      | 56.46     | 14.01     | 21.45     | 8.08      |           |           |           |        |         |         |         |         |
| 21.67 | 11.12   | 1.79      | 5.65      | 1.35      | 9.01      | 4.36      | 0.90      | 0.38      | 2.79      | 4.61      | 58.04     | 12.91     | 21.27     | 7.78      |           |           |           |        |         |         |         |         |
| 20.50 | 10.81   | 1.82      | 6.46      | 1.41      | 8.73      | 3.48      | 0.95      | 0.32      | 2.95      | 5.27      | 57.81     | 12.63     | 21.03     | 8.53      |           |           |           |        |         |         |         |         |
| 13.32 | 15.13   | 3.15      | 7.96      | 1.23      | 11.60     | 4.12      | 0.56      | 0.40      | 3.07      | 4.56      | 48.24     | 18.27     | 25.46     | 8.03      |           |           |           |        |         |         |         |         |
| 26.96 | 9.93    | 1.91      | 5.70      | 0.87      | 12.32     | 5.42      | 1.30      | 0.24      | 3.81      | 4.99      | 53.48     | 11.86     | 25.41     | 9.05      |           |           |           |        |         |         |         |         |
| 14.41 | 14.55   | 1.43      | 6.56      | 1.34      | 6.78      | 1.63      | 0.30      | 1.59      | 6.58      | 55.04     | 16.69     | 21.78     | 10.47     |           |           |           |           |        |         |         |         |         |
| 30.32 | 8.62    | 1.79      | 7.57      | 1.11      | 7.90      | 3.47      | 1.07      | 0.35      | 2.94      | 6.80      | 58.37     | 10.41     | 21.12     | 10.09     |           |           |           |        |         |         |         |         |
| 23.52 | 10.46   | 1.78      | 6.28      | 2.08      | 8.30      | 4.49      | 1.00      | 0.34      | 2.19      | 5.46      | 57.61     | 12.24     | 22.15     | 8.00      |           |           |           |        |         |         |         |         |
| 22.20 | 10.71   | 2.24      | 6.69      | 1.32      | 11.80     | 4.71      | 1.34      | 0.41      | 4.71      | 4.62      | 51.44     | 12.95     | 25.87     | 9.74      |           |           |           |        |         |         |         |         |
| 25.45 | 11.60   | 1.85      | 6.94      | 0.80      | 11.59     | 4.06      | 0.77      | 0.28      | 3.12      | 5.52      | 53.46     | 13.46     | 24.15     | 8.92      |           |           |           |        |         |         |         |         |
| 22.90 | 11.13   | 2.11      | 6.35      | 1.02      | 10.87     | 4.43      | 1.17      | 0.51      | 3.33      | 7.32      | 51.78     | 13.24     | 23.83     | 11.16     |           |           |           |        |         |         |         |         |
| 23.19 | 12.50   | 2.47      | 7.12      | 1.32      | 8.71      | 3.59      | 0.95      | 0.25      | 2.96      | 4.87      | 55.25     | 14.97     | 21.69     | 8.08      |           |           |           |        |         |         |         |         |
| 23.23 | 11.92   | 2.33      | 5.19      | 1.33      | 6.66      | 3.10      | 1.02      | 0.48      | 58.79     | 14.25     | 17.73     | 21.23     |           |           |           |           |           |        |         |         |         |         |
| 15.47 | 10.54   | 1.39      | 4.69      | 1.14      | 8.29      | 3.58      | 0.55      | 0.55      | 1.61      | 4.94      | 62.73     | 11.93     | 18.24     | 7.10      |           |           |           |        |         |         |         |         |
| 28.48 | 8.63    | 1.93      | 6.50      | 1.26      | 10.12     | 4.25      | 0.93      | 0.27      | 3.22      | 6.10      | 56.78     | 10.56     | 23.06     | 9.60      |           |           |           |        |         |         |         |         |
| 21.85 | 10.62   | 1.46      | 6.75      | 1.29      | 8.72      | 2.99      | 0.32      | 0.28      | 2.11      | 4.84      | 60.62     | 12.08     | 20.06     | 7.23      |           |           |           |        |         |         |         |         |
| 27.04 | 9.06    | 1.74      | 6.90      | 1.06      | 10.23     | 5.21      | 1.42      | 0.33      | 2.97      | 5.72      | 55.35     | 10.80     | 24.82     | 9.02      |           |           |           |        |         |         |         |         |
| 22.88 | 10.96   | 1.78      | 5.54      | 1.07      | 9.45      | 4.08      | 0.96      | 0.24      | 3.60      | 4.71      | 57.61     | 12.74     | 21.10     | 8.54      |           |           |           |        |         |         |         |         |
| 25.22 | 10.48   | 2.13      | 6.05      | 1.48      | 8.33      | 4.26      | 1.25      | 0.21      | 2.99      | 4.02      | 58.80     | 12.61     | 21.37     | 7.22      |           |           |           |        |         |         |         |         |
| 18.72 | 10.43   | 1.41      | 8.07      | 2.20      | 9.52      | 4.81      | 0.60      | 0.60      | 3.96      | 5.14      | 52.87     | 11.84     | 25.59     | 9.70      |           |           |           |        |         |         |         |         |
| 26.13 | 10.17   | 2.35      | 6.08      | 1.58      | 8.89      | 4.89      | 0.43      | 0.83      | 7.60      | 4.59      | 50.50     | 15.51     | 20.14     | 8.86      |           |           |           |        |         |         |         |         |
| 19.76 | 11.73   | 1.93      | 5.28      | 1.38      | 9.97      | 4.28      | 0.79      | 0.30      | 1.96      | 5.66      | 56.70     | 13.66     | 21.71     | 7.92      |           |           |           |        |         |         |         |         |
| 32.91 | 8.96    | 1.75      | 5.52      | 0.99      | 9.11      | 3.49      |           |           |           |           |           |           |           |           |           |           |           |        |         |         |         |         |
