# Supplementary material for: An 8 week randomized Dietary Guidelines for Americans -based diet intervention improves the omega-3 index of healthy women
Source: bioRxiv or medRxiv preprint supplement (doi:10.1101/2021.09.22.21263899), 2021-09-23
Supplement: Supplementary file [file media-6.pdf]

**Supplemental Table 4: Average Block food frequency questionnaire summary outputs**

| Subject_ID | Exclusion Comments                | Diet Group | Study Week | Diet Week | Baseline Adj OM3 Change Cluster | DT_KCAL | DT_PROT | DT_CARB | DT_TFAT | DT_ALCO |
|------------|-----------------------------------|------------|------------|-----------|---------------------------------|---------|---------|---------|---------|---------|
| 3          |                                   | TAD        | 1          | 0         | TAD                             | 5231    | 222.47  | 725.98  | 175.37  | 0.942   |
| 9          |                                   | DGAD       | 1          | 0         | DGAD Low Resp                   | 3266.58 | 112.38  | 387.02  | 144.24  | 1.09    |
| 20         |                                   | TAD        | 1          | 0         | TAD                             | 2929.32 | 103.54  | 392.14  | 110.22  | 0.936   |
| 32         |                                   | DGAD       | 1          | 0         | DGAD Low Resp                   | 2511.62 | 98.34   | 303.62  | 107.41  | 1.25    |
| 51         | Missing terminal blood draw       | TAD        | 1          | 0         | TAD                             | 1999.45 | 84.77   | 234.01  | 80.4    | 3.41    |
| 52         |                                   | TAD        | 1          | 0         | TAD                             | 1787.9  | 74.01   | 161.04  | 93.9    | 4.32    |
| 53         |                                   | TAD        | 1          | 0         | TAD                             | 4044.64 | 133.65  | 492.64  | 178.7   | 0.538   |
| 69         |                                   | TAD        | 1          | 0         | TAD                             | 1465.08 | 34.82   | 102.27  | 36.34   | 87.45   |
| 72         |                                   | DGAD       | 1          | 0         | DGAD Hi Resp                    | 1354.59 | 52.53   | 122.93  | 73.01   | 3.88    |
| 79         |                                   | DGAD       | 1          | 0         | DGAD Hi Resp                    | 1882.21 | 74.55   | 203.93  | 87.5    | 0.00115 |
| 84         |                                   | DGAD       | 1          | 0         | DGAD Hi Resp                    | 2634.05 | 97.05   | 345.04  | 101.13  | 2.62    |
| 85         |                                   | TAD        | 1          | 0         | TAD                             | 2269.79 | 87.91   | 272.95  | 80.76   | 20.07   |
| 87         |                                   | TAD        | 1          | 0         | TAD                             | 1565.91 | 78.55   | 184.07  | 59.78   | 0.745   |
| 96         |                                   | DGAD       | 1          | 0         | DGAD Hi Resp                    | 1284.41 | 37.31   | 175.74  | 52.05   | 1.17    |
| 97         |                                   | DGAD       | 1          | 0         | DGAD Hi Resp                    | 2168.15 | 83.67   | 268.72  | 85.77   | 2.88    |
| 102        |                                   | DGAD       | 1          | 0         | DGAD Hi Resp                    | 1297.24 | 48.47   | 127.8   | 54.64   | 18.47   |
| 107        |                                   | DGAD       | 1          | 0         | DGAD Hi Resp                    | 3315.06 | 123.5   | 403.02  | 141.83  | 0       |
| 109        |                                   | TAD        | 1          | 0         | TAD                             | 1705.79 | 73.98   | 177.23  | 66.56   | 16.97   |
| 112        |                                   | TAD        | 1          | 0         | TAD                             | 1838.88 | 69.79   | 201.4   | 84.7    | 1.76    |
| 113        |                                   | DGAD       | 1          | 0         | DGAD Hi Resp                    | 7378.84 | 329.19  | 822.34  | 307.83  | 8.08    |
| 135        |                                   | TAD        | 1          | 0         | TAD                             | 3635.83 | 139.03  | 467.64  | 140.26  | 0.306   |
| 137        |                                   | TAD        | 1          | 0         | TAD                             | 1998.46 | 93.67   | 183.63  | 101.94  | 0       |
| 139        |                                   | DGAD       | 1          | 0         | DGAD Hi Resp                    | 1308.07 | 52.11   | 159.71  | 51.9    | 4       |
| 144        |                                   | TAD        | 1          | 0         | TAD                             | 1568.83 | 51.23   | 133.62  | 96      | 1.99    |
| 151        | Missing baseline blood draw       | TAD        | 1          | 0         | TAD                             | 2573.4  | 96.31   | 313.57  | 112.57  | 0.01    |
| 154        |                                   | DGAD       | 1          | 0         | DGAD Low Resp                   | 2225.16 | 77.8    | 240.49  | 111.74  | 2.26    |
| 168        |                                   | TAD        | 1          | 0         | TAD                             | 2297.4  | 96.26   | 216.08  | 111.64  | 12.61   |
| 170        |                                   | TAD        | 1          | 0         | TAD                             | 2935.12 | 108.15  | 332.68  | 136.12  | 0.139   |
| 172        |                                   | DGAD       | 1          | 0         | DGAD Hi Resp                    | 1176.16 | 52.17   | 114.81  | 51.56   | 8.34    |
| 175        |                                   | TAD        | 1          | 0         | TAD                             | 3358.5  | 145.02  | 395.32  | 139.72  | 0.889   |
| 180        |                                   | TAD        | 1          | 0         | TAD                             | 3308.69 | 127.26  | 369.47  | 158.6   | 0.00231 |
| 182        |                                   | DGAD       | 1          | 0         | DGAD Low Resp                   | 2371.8  | 109.07  | 300.84  | 89.62   | 0.289   |
| 183        |                                   | TAD        | 1          | 0         | TAD                             | 2942.6  | 105.27  | 367.56  | 120.97  | 0.647   |
| 186        |                                   | TAD        | 1          | 0         | TAD                             | 2109.47 | 96.63   | 151.89  | 103.6   | 28.08   |
| 189        |                                   | DGAD       | 1          | 0         | DGAD Low Resp                   | 2621.52 | 117.6   | 289.46  | 116.71  | 1.01    |
| 194        |                                   | DGAD       | 1          | 0         | DGAD Low Resp                   | 1635.95 | 77.2    | 152.29  | 78.29   | 6.69    |
| 198        | screening and Visit 1 TG mismatch | DGAD       | 1          | 0         | DGAD Hi Resp                    | 2599.99 | 87.84   | 283.17  | 127.67  | 0       |
| 232        |                                   | TAD        | 1          | 0         | TAD                             | 547.46  | 22.37   | 62.93   | 23.59   | 1.31    |
| 234        |                                   | DGAD       | 1          | 0         | DGAD Low Resp                   | 1581.16 | 72.1    | 162.12  | 72.37   | 0.937   |
| 239        |                                   | TAD        | 1          | 0         | TAD                             | 1801.79 | 59.06   | 170.31  | 95.85   | 7.39    |
| 243        |                                   | DGAD       | 1          | 0         | DGAD Low Resp                   | 810.08  | 36.84   | 100.66  | 27.84   | 3.23    |
| 244        |                                   | DGAD       | 1          | 0         | DGAD Hi Resp                    | 1117.58 | 53.91   | 130.24  | 43.7    | 0       |
| 245        |                                   | DGAD       | 1          | 0         | DGAD Hi Resp                    | 2943.95 | 132.28  | 311.8   | 132.53  | 1.17    |
| 258        |                                   | DGAD       | 1          | 0         | DGAD Low Resp                   | 1504.57 | 61.54   | 161.29  | 68.9    | 3.38    |

| DT_SUG_T | DT_FIBE | DT_MOIS | DT_SFAT | DT_MFAT | DT_PFAT | DT_CHOL | CARB/FAT_DT | MFAT/SFAT | PFAT/SFAT | SFAT/TFAT | MFAT/TFAT | PFAT/TFAT |
|----------|---------|---------|---------|---------|---------|---------|-------------|-----------|-----------|-----------|-----------|-----------|
| 302.54   | 91.79   | 4984.76 | 50.93   | 64.39   | 44.35   | 463.32  | 4.139705    | 1.264284  | 0.870803  | 0.290415  | 0.367167  | 0.252894  |
| 155.32   | 27.49   | 2193.2  | 52.5    | 51.23   | 29.52   | 322.11  | 2.683167    | 0.97581   | 0.562286  | 0.363977  | 0.355172  | 0.204659  |
| 151.92   | 45.92   | 3010.69 | 35.75   | 39.08   | 26.8    | 201.51  | 3.557794    | 1.093147  | 0.74965   | 0.324351  | 0.354564  | 0.24315   |
| 112.79   | 42.83   | 3148.39 | 34.16   | 40.95   | 23.44   | 334.34  | 2.826739    | 1.19877   | 0.686183  | 0.318034  | 0.381249  | 0.218229  |
| 71.58    | 21.58   | 1308.29 | 25.91   | 30.3    | 17.04   | 266.8   | 2.910572    | 1.169433  | 0.657661  | 0.322264  | 0.376866  | 0.21194   |
| 48.75    | 17.16   | 1930.98 | 34.3    | 35.94   | 16.53   | 311.09  | 1.715016    | 1.047813  | 0.481924  | 0.365282  | 0.382748  | 0.176038  |
| 195.94   | 44.18   | 3023.67 | 54.2    | 71.88   | 39.64   | 386.39  | 2.756799    | 1.326199  | 0.731365  | 0.303302  | 0.402238  | 0.221824  |
| 54.94    | 5.54    | 2741.7  | 12.82   | 12.92   | 7.26    | 142.48  | 2.814254    | 1.0078    | 0.566303  | 0.352779  | 0.355531  | 0.19978   |
| 43.2     | 16.45   | 2051.72 | 23.41   | 27.62   | 16.79   | 190.26  | 1.683742    | 1.179838  | 0.717215  | 0.320641  | 0.378304  | 0.229968  |
| 55.51    | 18.75   | 817.63  | 30.6    | 31.95   | 17.51   | 265.76  | 2.330629    | 1.044118  | 0.572222  | 0.349714  | 0.365143  | 0.200114  |
| 125.79   | 35.84   | 3440.96 | 31.32   | 37.39   | 23.78   | 240.56  | 3.411846    | 1.193806  | 0.759259  | 0.3097    | 0.369722  | 0.235143  |
| 105.18   | 26.15   | 2959.12 | 25.66   | 29.48   | 18.64   | 262.08  | 3.379767    | 1.14887   | 0.726422  | 0.317732  | 0.365032  | 0.230807  |
| 69.51    | 17.93   | 1611.9  | 17.03   | 23.42   | 14.21   | 178.89  | 3.079123    | 1.37522   | 0.83441   | 0.284878  | 0.39177   | 0.2307705 |
| 87.41    | 15.86   | 3728.03 | 15.64   | 18.16   | 14.55   | 104.48  | 3.376369    | 1.161125  | 0.930307  | 0.30048   | 0.348895  | 0.279539  |
| 118.3    | 22.87   | 2494.62 | 26.9    | 31.64   | 20.19   | 258.09  | 3.13303     | 1.176208  | 0.750558  | 0.313629  | 0.368894  | 0.235397  |
| 46.36    | 15.87   | 2010.42 | 13.98   | 21.46   | 14.97   | 168.77  | 2.338946    | 1.53505   | 1.070815  | 0.255857  | 0.392753  | 0.273975  |
| 182.93   | 37.37   | 3334.34 | 46.31   | 51.67   | 32.32   | 597.29  | 2.841571    | 1.115742  | 0.697905  | 0.326518  | 0.364309  | 0.227878  |
| 65.86    | 14.69   | 2492.13 | 21.02   | 25.13   | 14.22   | 429.77  | 2.66271     | 1.195528  | 0.676499  | 0.315805  | 0.377554  | 0.213642  |
| 66.42    | 16.16   | 1811.11 | 25.94   | 32.42   | 19.22   | 253.56  | 2.377804    | 1.249807  | 0.740941  | 0.306257  | 0.382763  | 0.226919  |
| 357.61   | 59      | 5904.95 | 94.29   | 115.56  | 69.84   | 1202.3  | 2.67141     | 1.225581  | 0.740694  | 0.306305  | 0.375402  | 0.226878  |
| 281.31   | 28.61   | 4501.78 | 53.12   | 48.25   | 26.9    | 462.08  | 3.334094    | 0.908321  | 0.506401  | 0.378725  | 0.344004  | 0.191787  |
| 68.42    | 17.27   | 1721.72 | 40.1    | 35.42   | 18.28   | 350.73  | 1.801354    | 0.883292  | 0.45586   | 0.393369  | 0.347459  | 0.179321  |
| 96.85    | 12.87   | 2196.76 | 20.45   | 18.21   | 9.17    | 152.74  | 3.077264    | 0.890465  | 0.448411  | 0.394027  | 0.350867  | 0.176686  |
| 65.73    | 19.39   | 2180.44 | 30.89   | 43.39   | 15.11   | 304.28  | 1.391875    | 1.404662  | 0.489155  | 0.321771  | 0.451979  | 0.157396  |
| 128.58   | 44.97   | 3274.86 | 30.07   | 43.67   | 31.11   | 325.25  | 2.785556    | 1.452278  | 1.034586  | 0.267123  | 0.387936  | 0.276361  |
| 96.69    | 38.54   | 2637.92 | 32.45   | 46.22   | 24.29   | 304.21  | 2.152228    | 1.424345  | 0.748536  | 0.290406  | 0.413639  | 0.21738   |
| 82.26    | 19.53   | 2453.87 | 37.84   | 41.78   | 23.72   | 296.08  | 1.935507    | 1.104123  | 0.62685   | 0.338947  | 0.374239  | 0.212469  |
| 121.08   | 34.12   | 3222.35 | 51.24   | 48.22   | 25.29   | 351.73  | 2.44402     | 0.941062  | 0.49356   | 0.376433  | 0.354246  | 0.185792  |
| 52.32    | 8.49    | 2065.7  | 18.35   | 18.72   | 10.16   | 284.95  | 2.226726    | 1.020163  | 0.553678  | 0.355896  | 0.363072  | 0.197052  |
| 156.1    | 40.04   | 2860.79 | 37.47   | 55.51   | 35.42   | 335.09  | 2.829373    | 1.481452  | 0.94529   | 0.268179  | 0.397295  | 0.253507  |
| 147      | 51.33   | 2534.46 | 40.18   | 58.29   | 47.52   | 337.54  | 2.329571    | 1.450722  | 1.182678  | 0.253342  | 0.367528  | 0.299622  |
| 132.22   | 40.48   | 3302.37 | 24.32   | 37.38   | 20.07   | 312.71  | 3.35684     | 1.537007  | 0.825247  | 0.271368  | 0.417094  | 0.223946  |
| 135.57   | 27.55   | 2864.19 | 41.75   | 44.58   | 24.37   | 365.99  | 3.038439    | 1.067784  | 0.583713  | 0.345127  | 0.368521  | 0.201455  |
| 32.37    | 13.6    | 2293.59 | 36.18   | 40.28   | 17.77   | 332.65  | 1.46612     | 1.113322  | 0.491155  | 0.349228  | 0.388803  | 0.171525  |
| 124.81   | 37.09   | 3660.16 | 37.23   | 41.81   | 27.9    | 370.71  | 2.480165    | 1.123019  | 0.749396  | 0.318996  | 0.358238  | 0.239054  |
| 49.32    | 19.59   | 2799.58 | 27.35   | 28.87   | 15.35   | 355.49  | 1.945204    | 1.055576  | 0.561243  | 0.349342  | 0.368757  | 0.196066  |
| 94.42    | 24.84   | 2193.19 | 42.8    | 42.25   | 32.41   | 282.84  | 2.217984    | 0.98715   | 0.757243  | 0.335239  | 0.330931  | 0.253858  |
| 24.12    | 7.6     | 2058.17 | 6.75    | 8.72    | 5.98    | 73.1    | 2.667656    | 1.291852  | 0.885926  | 0.286138  | 0.369648  | 0.253497  |
| 53.43    | 12.62   | 1946.18 | 25.55   | 27.17   | 13.17   | 334.62  | 2.240155    | 1.063405  | 0.51546   | 0.353047  | 0.375432  | 0.181981  |
| 77.18    | 14.2    | 1940.53 | 26.41   | 40.53   | 22.15   | 197.39  | 1.776839    | 1.534646  | 0.838697  | 0.275535  | 0.422848  | 0.23109   |
| 42.57    | 8.32    | 1550.41 | 10.25   | 9.9     | 4.87    | 101.09  | 3.615661    | 0.965854  | 0.475122  | 0.368175  | 0.355603  | 0.174928  |
| 63.31    | 9.53    | 1463.95 | 17.43   | 14.93   | 7.25    | 173     | 2.98032     | 0.856569  | 0.41595   | 0.398856  | 0.341648  | 0.165904  |
| 84.91    | 35.29   | 3131.85 | 46.25   | 47.44   | 27.51   | 451.1   | 2.352675    | 1.02573   | 0.594811  | 0.348978  | 0.357957  | 0.207576  |
| 52.31    | 21.68   | 3089.68 | 26.04   | 25.51   | 12.03   | 218.11  | 2.340929    | 0.979647  | 0.461982  | 0.377939  | 0.370247  | 0.174601  |

| CARB/kcal | FAT/kcal | PROT/kcal | dt_vitd | dt_vitk | dt_vitc | dt_thia | dt_ribo | dt_niac | dt_vitb6 | dt_tfol | fol_dfe | dt_folac |
|-----------|----------|-----------|---------|---------|---------|---------|---------|---------|----------|---------|---------|----------|
| 0.138784  | 0.033525 | 0.042529  | 13.76   | 584.65  | 435.63  | 5.91    | 4.28    | 65.42   | 6.75     | 1254.63 | 1378.59 | 177.32   |
| 0.118479  | 0.044156 | 0.034403  | 6.34    | 101.64  | 44.11   | 2.48    | 2.39    | 27.59   | 2.14     | 594.59  | 766.78  | 250.84   |
| 0.133867  | 0.037626 | 0.035346  | 3.3     | 170.04  | 109.63  | 2.23    | 2.12    | 25.39   | 2.59     | 651.51  | 775.73  | 183.43   |
| 0.120886  | 0.042765 | 0.039154  | 5.2     | 773.31  | 187.49  | 2.27    | 2.03    | 26.35   | 2.91     | 667.2   | 749.66  | 116.94   |
| 0.117037  | 0.040211 | 0.042397  | 4.73    | 131.33  | 65.01   | 1.92    | 1.71    | 23.62   | 1.94     | 416.25  | 555.42  | 198.08   |
| 0.090072  | 0.05252  | 0.041395  | 5.82    | 198.4   | 81.21   | 1.54    | 1.37    | 15.89   | 1.62     | 404.95  | 521.92  | 166.31   |
| 0.121801  | 0.044182 | 0.033044  | 9.63    | 160.07  | 129.95  | 3.3     | 2.48    | 33.32   | 3.27     | 706.49  | 904.58  | 283.13   |
| 0.069805  | 0.024804 | 0.023767  | 3.54    | 34.2    | 33.46   | 1.07    | 0.558   | 10.36   | 0.676    | 113.61  | 141.13  | 39.39    |
| 0.090751  | 0.053898 | 0.038779  | 2.35    | 135.57  | 64.12   | 1.01    | 0.821   | 12.4    | 1.14     | 292.47  | 328.87  | 52.64    |
| 0.108346  | 0.046488 | 0.039608  | 4.11    | 89.76   | 57.47   | 1.69    | 1.64    | 22.26   | 1.89     | 489.22  | 690.58  | 287.78   |
| 0.130992  | 0.038393 | 0.036844  | 5.61    | 158.69  | 116.65  | 3.45    | 3.02    | 37.75   | 3.45     | 624.16  | 844.24  | 315.24   |
| 0.120253  | 0.03558  | 0.03873   | 5.51    | 259.68  | 122.9   | 2.82    | 2.06    | 29.99   | 2.71     | 561.45  | 713.28  | 216.83   |
| 0.117548  | 0.038176 | 0.050163  | 2.93    | 185.51  | 75.67   | 2.22    | 1.67    | 29.43   | 2.41     | 367.49  | 484.42  | 167.17   |
| 0.136825  | 0.040524 | 0.029048  | 1.72    | 239.81  | 99.35   | 1.45    | 0.975   | 14.33   | 1.07     | 334.76  | 401.83  | 94.67    |
| 0.12394   | 0.039559 | 0.038591  | 4.99    | 101.5   | 98.68   | 1.94    | 1.59    | 22.49   | 1.99     | 407.36  | 510.26  | 146.1    |
| 0.098517  | 0.04212  | 0.037364  | 2.14    | 224.55  | 74.96   | 1.19    | 0.898   | 12.82   | 1.34     | 263.92  | 294.22  | 43.66    |
| 0.121572  | 0.042784 | 0.037254  | 10.47   | 257.76  | 86.58   | 3.6     | 2.32    | 32.93   | 3.05     | 577.65  | 717.48  | 199.53   |
| 0.103899  | 0.03902  | 0.04337   | 4.63    | 96.03   | 53.5    | 2.05    | 1.22    | 16.71   | 1.75     | 424.77  | 549.57  | 177.9    |
| 0.109523  | 0.046061 | 0.037952  | 2.55    | 120.59  | 83.17   | 1.94    | 1.23    | 23.85   | 2.17     | 370.45  | 478.98  | 153.27   |
| 0.111446  | 0.041718 | 0.044613  | 12.93   | 319.89  | 306.42  | 6.06    | 5.11    | 86.48   | 6.56     | 1145.14 | 1449.22 | 434.7    |
| 0.12862   | 0.038577 | 0.038239  | 17.99   | 180.25  | 237.07  | 4.49    | 2.69    | 34.6    | 3.33     | 621.91  | 772.29  | 215.14   |
| 0.091886  | 0.051009 | 0.046871  | 4.2     | 84.95   | 97.59   | 2.2     | 1.41    | 21.2    | 2.03     | 363.54  | 467.18  | 148.66   |
| 0.122096  | 0.039677 | 0.039837  | 2.3     | 35.8    | 72.91   | 1.58    | 0.782   | 12.76   | 1.34     | 190.68  | 223.82  | 48.48    |
| 0.085172  | 0.061192 | 0.032655  | 6.41    | 400.3   | 128.41  | 1.32    | 0.854   | 16.02   | 1.72     | 352.69  | 385.13  | 45.97    |
| 0.12185   | 0.043744 | 0.037425  | 5.25    | 548.72  | 225.54  | 2.43    | 2.35    | 26.85   | 3        | 737.72  | 864.55  | 183.57   |
| 0.108078  | 0.050217 | 0.034964  | 3.28    | 414.12  | 193.07  | 1.96    | 1.55    | 21.42   | 2.34     | 531.91  | 579.75  | 70.01    |
| 0.094054  | 0.048594 | 0.0419    | 4.76    | 107.53  | 38.65   | 2.18    | 1.44    | 26.65   | 2.12     | 421.56  | 536.68  | 164.67   |
| 0.113345  | 0.046376 | 0.036847  | 7.06    | 278.85  | 156.85  | 2.57    | 2.2     | 28.18   | 2.87     | 588.14  | 729     | 198.81   |
| 0.097614  | 0.043838 | 0.044356  | 4.8     | 71.96   | 52.52   | 1.52    | 0.774   | 13.81   | 1.14     | 201.79  | 239.08  | 53.53    |
| 0.117707  | 0.041602 | 0.04318   | 9.79    | 194.47  | 134.02  | 3.43    | 2.95    | 45.41   | 3.57     | 710.57  | 905.4   | 281.05   |
| 0.111667  | 0.047934 | 0.038462  | 7.59    | 409.59  | 184.47  | 3.3     | 2.84    | 43.75   | 4.28     | 1052.1  | 1375.36 | 463.42   |
| 0.12684   | 0.037786 | 0.045986  | 10.17   | 770.26  | 208.34  | 2.79    | 1.88    | 28.29   | 3.06     | 655.76  | 722.16  | 94.2     |
| 0.12491   | 0.04111  | 0.035774  | 7.02    | 105.98  | 139.08  | 2.83    | 2.51    | 32.73   | 2.89     | 718.13  | 1042.94 | 464.72   |
| 0.072004  | 0.049112 | 0.045808  | 2.78    | 71.4    | 34.52   | 2.13    | 1.38    | 28.69   | 2        | 315.8   | 381.25  | 93       |
| 0.110417  | 0.04452  | 0.044859  | 5.68    | 499.29  | 244.58  | 2.25    | 1.88    | 32.51   | 2.96     | 625     | 715.26  | 131.68   |
| 0.09309   | 0.047856 | 0.04719   | 5.49    | 158.22  | 83.84   | 1.89    | 1.36    | 19.48   | 1.84     | 364.31  | 441.62  | 110.33   |
| 0.108912  | 0.049104 | 0.033785  | 5.14    | 266.72  | 97.98   | 2.14    | 1.81    | 23.35   | 1.88     | 468.09  | 579.24  | 160.3    |
| 0.114949  | 0.04309  | 0.040861  | 1.77    | 92.49   | 48.97   | 0.531   | 0.495   | 7.49    | 0.676    | 173.03  | 225.95  | 75.67    |
| 0.102532  | 0.04577  | 0.045599  | 2.22    | 81.37   | 40.28   | 1.31    | 1.31    | 20.11   | 1.52     | 263.87  | 342.59  | 112.19   |
| 0.094523  | 0.053197 | 0.032779  | 4.11    | 155.16  | 60.37   | 1.55    | 1.14    | 17.85   | 1.46     | 275.67  | 352.39  | 109.96   |
| 0.124259  | 0.034367 | 0.045477  | 3.27    | 55.57   | 24      | 1.22    | 0.804   | 10.04   | 0.884    | 177.38  | 228.75  | 73.08    |
| 0.116538  | 0.039102 | 0.048238  | 3.64    | 79.88   | 30.54   | 1.29    | 0.837   | 15.54   | 1.22     | 193.18  | 237.06  | 62.56    |
| 0.105912  | 0.045018 | 0.044933  | 4.97    | 208.74  | 92.98   | 2.49    | 2.24    | 34.51   | 2.95     | 571.83  | 698.21  | 181.98   |
| 0.1072    | 0.045794 | 0.040902  | 2.33    | 210.15  | 64.56   | 1.63    | 1.24    | 12.51   | 1.35     | 383.66  | 448.57  | 93.17    |

| dt_folfd | dt_vb12 | dt_zinc | group_fried_fish_fish_sticks_sandwich_breaded_filletlets_total_grams FFQ | group_high_omega3_fish_total_grams FFQ | group_other_fish_dishes_low_omega3_total_grams FFQ | group_shellfish_except_oysters_total_grams FFQ | sup_dha FFQ | dha_epa FFQ | (FFQ_EPA+DHA):TFAT | (FFQ_EPA+DHA):SFAT |
|----------|---------|---------|--------------------------------------------------------------------------|----------------------------------------|----------------------------------------------------|------------------------------------------------|-------------|-------------|--------------------|--------------------|
| 1076.4   | 15.24   | 35.1    | 3.76                                                                     | 12.23                                  |                                                    | 10.54                                          |             | 0.236       | 0.001346           | 0.004634           |
| 342.85   | 5.9     | 15.21   |                                                                          |                                        |                                                    | 2.26                                           |             | 0.0359      | 0.000249           | 0.000684           |
| 470.37   | 3.9     | 16.22   |                                                                          |                                        |                                                    |                                                |             | 0.0428      | 0.000388           | 0.001197           |
| 549.95   | 5.07    | 15.89   |                                                                          | 14.57                                  | 14.77                                              | 10.54                                          |             | 0.219       | 0.002039           | 0.006411           |
| 217.19   | 5.46    | 12.98   | 8.69                                                                     | 1.68                                   | 1.68                                               | 6.54                                           |             | 0.098       | 0.001219           | 0.003782           |
| 238.17   | 5.51    | 11.68   | 3.76                                                                     | 12.23                                  | 14.77                                              | 4.57                                           |             | 0.234       | 0.002492           | 0.006822           |
| 422.66   | 8       | 20.8    | 17.54                                                                    |                                        | 6.4                                                | 19.57                                          |             | 0.144       | 0.000806           | 0.002657           |
| 74.27    | 2.28    | 5.11    | 3.76                                                                     | 2.62                                   | 0.981                                              | 4.29                                           |             | 0.061       | 0.001679           | 0.004758           |
| 239.86   | 2.94    | 8.07    | 1.86                                                                     | 5.3                                    | 3.4                                                | 10.54                                          |             | 0.105       | 0.001438           | 0.004485           |
| 201      | 5.38    | 12.25   | 1.86                                                                     | 7.85                                   | 1.68                                               | 6.54                                           |             | 0.13        | 0.001486           | 0.004248           |
| 308.46   | 7.4     | 17.6    | 3.76                                                                     | 5.3                                    |                                                    | 4.57                                           |             | 0.117       | 0.001157           | 0.003736           |
| 344.88   | 5.32    | 12.84   |                                                                          |                                        | 3.16                                               | 2.26                                           |             | 0.0555      | 0.000687           | 0.002163           |
| 200.51   | 4.84    | 11.65   |                                                                          | 3.4                                    | 1.68                                               | 1.4                                            |             | 0.0762      | 0.001275           | 0.004474           |
| 240.09   | 1.88    | 5.95    | 1.12                                                                     | 2.1                                    | 0.981                                              | 6.54                                           |             | 0.0539      | 0.001036           | 0.003446           |
| 261.17   | 5.95    | 13.29   | 3.76                                                                     | 5.3                                    | 6.4                                                | 10.54                                          |             | 0.128       | 0.001492           | 0.004758           |
| 220.23   | 2.76    | 8.22    |                                                                          | 7.85                                   | 1.68                                               | 10.54                                          |             | 0.119       | 0.002178           | 0.008512           |
| 376.91   | 6.87    | 19.16   | 4.48                                                                     | 4.55                                   | 4.55                                               | 20.04                                          |             | 0.183       | 0.00129            | 0.003952           |
| 247.06   | 5.13    | 9.74    | 9.71                                                                     | 2.62                                   | 3.16                                               | 2.26                                           |             | 0.113       | 0.001698           | 0.005376           |
| 217.26   | 4.22    | 9.78    |                                                                          | 1.68                                   | 1.68                                               | 3.08                                           |             | 0.0607      | 0.000717           | 0.00234            |
| 713.06   | 24.32   | 61.88   | 98.79                                                                    | 1.68                                   | 54.86                                              | 62.32                                          | 17.14       | 0.847       | 0.002752           | 0.008983           |
| 406.62   | 11.34   | 23.42   | 7.6                                                                      |                                        |                                                    |                                                |             | 0.0648      | 0.000462           | 0.00122            |
| 214.38   | 5.12    | 12.85   |                                                                          |                                        |                                                    |                                                |             | 0.0374      | 0.000367           | 0.000933           |
| 142.02   | 3.32    | 7.73    |                                                                          |                                        |                                                    | 4.29                                           |             | 0.0265      | 0.000511           | 0.001296           |
| 307.24   | 3.77    | 7.27    |                                                                          | 29.14                                  | 14.77                                              | 2.26                                           |             | 0.341       | 0.003552           | 0.011039           |
| 553.72   | 4.06    | 15.22   |                                                                          |                                        | 6.4                                                | 2.26                                           |             | 0.0623      | 0.000553           | 0.002072           |
| 461.78   | 3.28    | 12.63   |                                                                          | 12.23                                  |                                                    | 2.26                                           |             | 0.158       | 0.001414           | 0.004869           |
| 257.19   | 5.07    | 13.27   |                                                                          |                                        |                                                    |                                                | 120         | 0.0354      | 0.000317           | 0.000936           |
| 389.16   | 7.08    | 16.2    |                                                                          | 5.3                                    | 6.4                                                | 2.26                                           |             | 0.126       | 0.000926           | 0.002459           |
| 148.09   | 3.71    | 6.76    |                                                                          | 7.85                                   | 3.4                                                | 10.54                                          |             | 0.144       | 0.002793           | 0.007847           |
| 429.39   | 8.24    | 20.7    | 38.86                                                                    | 22.71                                  | 6.4                                                | 19.57                                          |             | 0.415       | 0.00297            | 0.011076           |
| 588.76   | 7.47    | 25.11   |                                                                          | 21.23                                  | 3.16                                               | 20.04                                          | 17.14       | 0.296       | 0.001866           | 0.007367           |
| 561.72   | 6.81    | 15.94   | 5.23                                                                     | 18                                     | 25.78                                              | 17.33                                          | 120         | 0.327       | 0.003649           | 0.013446           |
| 253.01   | 6.3     | 17.35   | 3.77                                                                     | 3.4                                    | 0.981                                              | 2.83                                           | 87.99       | 0.096       | 0.000794           | 0.002299           |
| 222.84   | 5.35    | 15.37   |                                                                          |                                        | 3.16                                               | 4.29                                           |             | 0.0788      | 0.000761           | 0.002178           |
| 494.73   | 4.83    | 15.83   | 3.76                                                                     | 2.62                                   | 3.16                                               | 8.68                                           |             | 0.153       | 0.001311           | 0.00411            |
| 253.99   | 5.48    | 10.63   | 1.86                                                                     | 7.85                                   | 29.14                                              | 1.4                                            | 22          | 0.218       | 0.002785           | 0.007971           |
| 307.54   | 4.38    | 11.93   | 7.6                                                                      | 12.23                                  | 3.16                                               | 2.83                                           |             | 0.172       | 0.001347           | 0.004019           |
| 97.41    | 1.67    | 4.79    | 1.86                                                                     | 5.3                                    | 6.4                                                | 2.83                                           | 75          | 0.086       | 0.003646           | 0.012741           |
| 152      | 3.2     | 9.65    |                                                                          |                                        |                                                    | 2.26                                           |             | 0.059       | 0.000815           | 0.002309           |
| 166.09   | 4.52    | 9.14    | 1.86                                                                     | 7.85                                   | 1.68                                               | 1.4                                            |             | 0.124       | 0.001294           | 0.004695           |
| 104.51   | 3.51    | 6.22    | 1.12                                                                     | 2.1                                    | 4.58                                               | 1.4                                            |             | 0.0466      | 0.001674           | 0.004546           |
| 130.53   | 2.94    | 7.51    |                                                                          | 2.62                                   |                                                    | 2.26                                           |             | 0.0612      | 0.0014             | 0.003511           |
| 388.78   | 7.14    | 19.58   | 3.76                                                                     | 2.62                                   | 21.23                                              | 20.04                                          |             | 0.179       | 0.001351           | 0.00387            |
| 290.47   | 3.08    | 10.38   | 1.86                                                                     |                                        | 1.68                                               | 0.659                                          |             | 0.0312      | 0.000453           | 0.001198           |
